# Supplementary material for: Vascular differentiation of multipotent spermatogonial stem cells derived from neonatal mouse testis
Source: PubMed Central journal article supplement — Exp Mol Med. 2012 Jan 19;44(4):303–9. doi: 10.3858/emm.2012.44.4.034 (PMC3349912; doi:10.3858/emm.2012.44.4.034), 2012-01-19
Supplement: emm-44-303-s001.pdf [file emm-44-303-s001.pdf]

**Supplementary Table I. Primer sequences**

| Primer        | Forward (5' to 3')   | Reverse (5' to 3')   | Product (bp) |
|---------------|----------------------|----------------------|--------------|
| Nanog         | tatctggtgaacgcatctgg | gaagttatggagcggagcag | 195          |
| Oct3/4        | agctgctgaagcagaagagg | ctcattggttcggcttct   | 194          |
| Brachyury     | ttcttgctggacttcgtga  | tccattgagcttgttggtga | 196          |
| Mesp 1        | actcagcaggacaacct    | gatgggtcccacgattct   | 195          |
| Flk-1         | tgctacctcacctgttcc   | tctgtctggctgcatctgg  | 196          |
| Islet1        | tcatccgagtgtggttcaa  | ggctggtaacttgcacctc  | 196          |
| Nkx2.5        | ccagaaccgtcgctacaagt | gggtaggcgtttagccata  | 195          |
| CD31          | atgaccagcaacattcaca  | cacagagcaccgaagtacca | 200          |
| VE-Cadherin   | caatgacaactccccgtct  | tcgttacgttggggctctgt | 195          |
| $\alpha$ -SMA | gtgcctatctatgagggcta | gccatctcattttcaaagtc | 197          |
| Myocardin     | agttgtacactccttctgtg | atccataggggaattcagat | 197          |
| GAPDH         | atgactccactcacggcaaa | atgatgacccttttggetcc | 227          |

**Supplementary Table II.** siRNA sequences

| siRNA Target Gene   | siRNA sequence (5' to 3')                                                                                    |
|---------------------|--------------------------------------------------------------------------------------------------------------|
| Human c-Kit         | 1. UCAUUCUUGAUGUCUCUGGtt<br>2. UUUGAGUUCAGACAUGAGGtt<br>3. UCUUAUAAAGUGCAGCUUCtt<br>4. UACAAUGCCAUUCUGAAGCtt |
| Human Scl           | 1. UUAGGAAAGACAGGGAUCCtt<br>2. AAAGCAUUCAUAGGACAGGtt<br>3. UACAGUACAACGUUGACGGtt                             |
| Human LMO2          | 1. AUUGAUCUUAGUCCACUCGtt<br>2. UUACUAUGGAUGGGCUGUGtt<br>3. AUCAAUUGCACAUCUCUAGtt                             |
| Human GATA2         | 1. UUUCAUACUAGGGCUGUGGtt<br>2. UAAGUUACUUCUGGCCGUGtt<br>3. AAAGGAAUAAGAGGAUAGCtt                             |
| Human Control siRNA | AAUGGAAGACCACUCCCACUC                                                                                        |

## Supplementary Figure I.

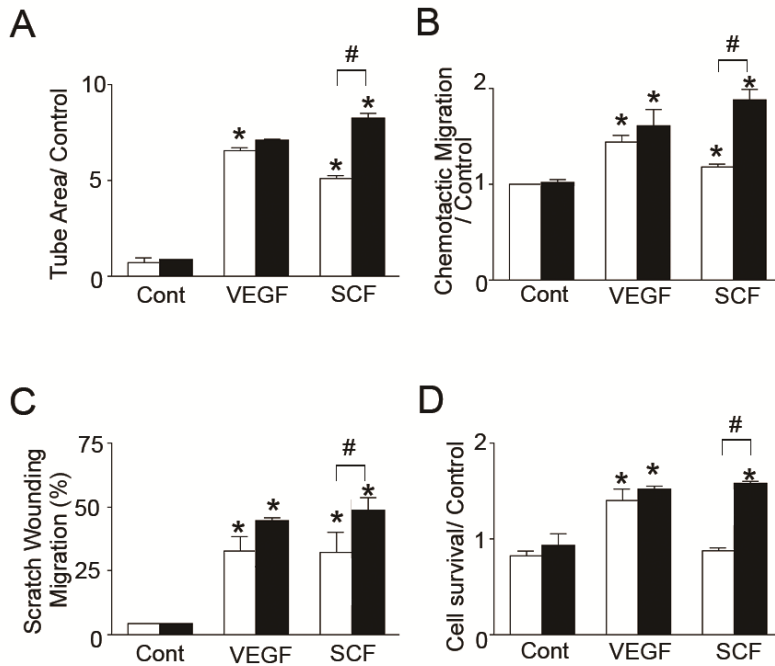

**SCF markedly increases *in vitro* neovascularization activity of EPCs, but has moderate effects on human dermal microvascular endothelial cells (HDMECs).**

Quantitative analysis of tube formation (A), chemotactic cell migration (B), scratch wounding migration (C), and cell survival (D) in HDMECs (white bars) and EPCs (black bars) was performed in response to recombinant human SCF (10 ng/ml) or VEGF (10 ng/ml).

Chemotactic migration, tube formation, and cell survival responses of EPCs to SCF or VEGF were compared by normalizing the values relative to those of the corresponding PBS controls.

Scratch wounding migration was assessed by measuring the relative area covered by cells that had migrated from the wound edges. (\* $p < 0.05$  vs. PBS control, <sup>#</sup> $p < 0.05$ ,  $n = 4$ ).

## Supplementary Figure II.

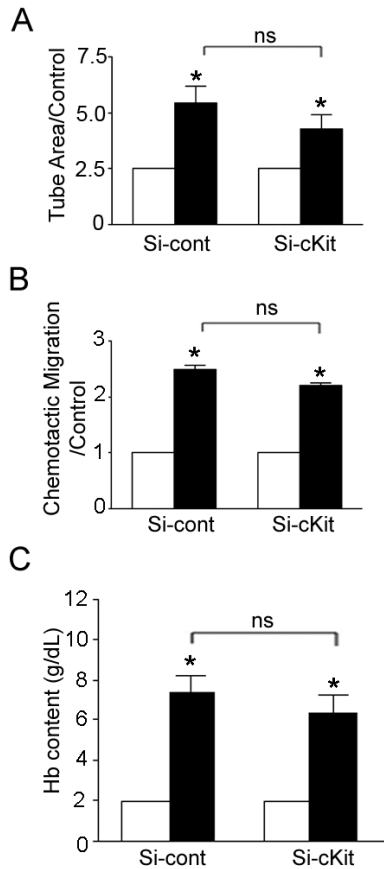

**Knockdown of c-Kit expression has no effect on VEGF-induced increase in *in vitro* and *in vivo* neovascularization activity of EPCs.**

*In vitro* angiogenesis (A: tube formation, B: chemotactic cell migration) and *in vivo* Matrigel plug assays (C) were performed with EPCs transfected with c-Kit specific siRNA (si-cKit) or control siRNA (si-cont) in response to recombinant human VEGF (black bars, 10 ng/ml for *in vitro* assay or 200 ng in 0.6 ml of Matrigel for *in vivo* assays) or PBS control (white bars). *In vitro* and *in vivo* assays were performed as described. Cellular responses to VEGF were compared by normalizing their values relative to those of the corresponding PBS control (\* $p < 0.05$  vs. PBS control,  $n = 3$ , ns: not significant).

**Supplementary Figure III.**

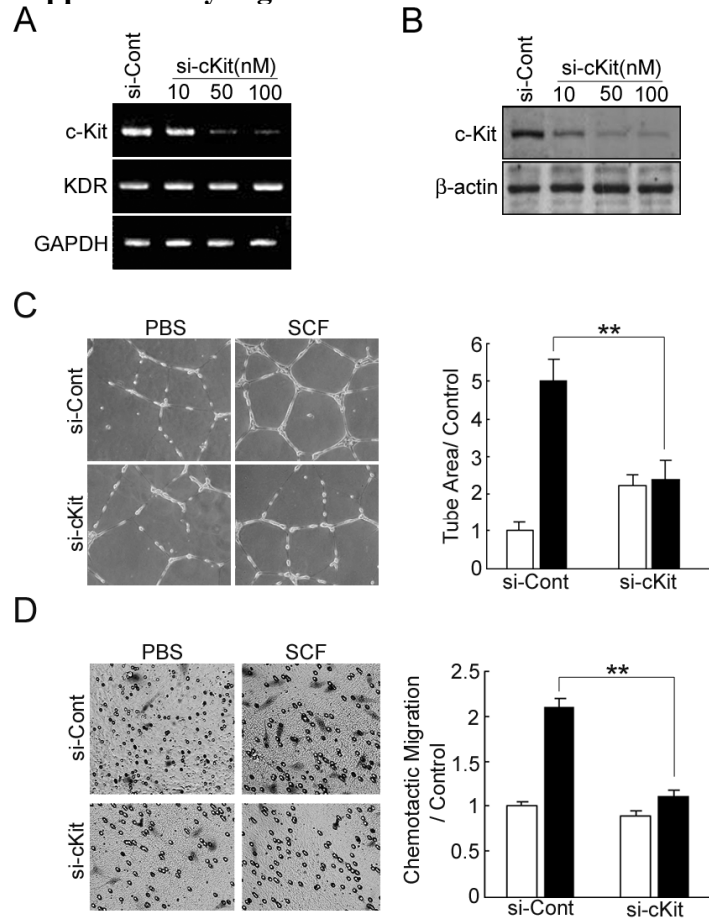

**SCF increases the angiogenic activity of HUVECs through c-Kit receptor.**

(A-B) c-Kit expression was substantially reduced by transfection with c-Kit specific siRNA. HUVECs were transfected with various concentrations of c-Kit specific siRNA (si-cKit) or control siRNA (si-Cont). After 48 h, reduced c-Kit mRNA and protein expression was confirmed by RT-PCR (A) and western blotting (B). The mRNA or protein levels of KDR, GAPDH, β-actin were analyzed as loading controls. (C-D) silencing c-Kit abrogates the SCF-induced increase in tube formation and migration of HUVECs. Representative images and quantitative analysis of tube formation (C) and chemotactic migration (D) in c-Kit silenced HUVECs in response to recombinant human SCF (10 ng/ml, black bars) or PBS

control (white bars). Cellular responses to SCF were compared by normalizing their values relative to those of the corresponding PBS control (\*\* $p < 0.01$ ,  $n = 5$ ).

### Supplementary Figure IV.

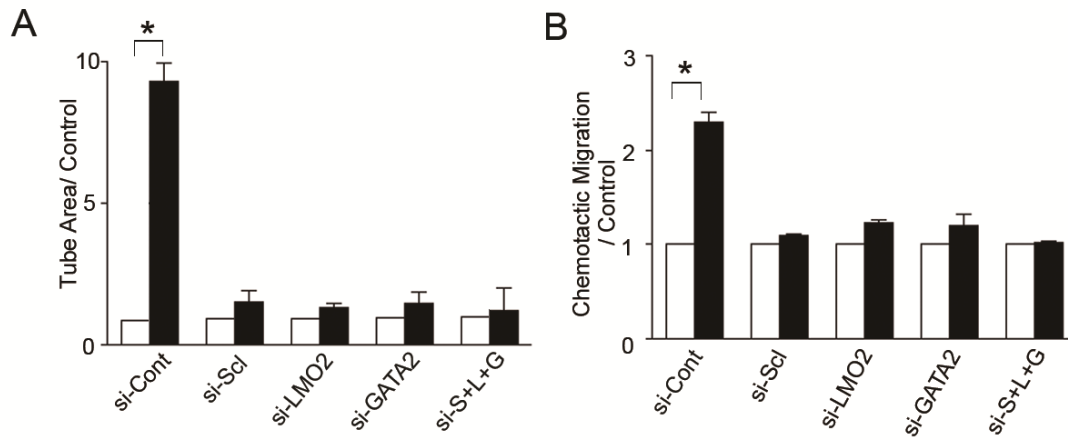

### Silencing of Scl, LMO2, or GATA2 abrogates SCF-induced increase in neovascularization activity of EPCs.

Tube formation (A) and chemotactic cell migration (B) were performed with siRNA-transfected EPCs in response to recombinant human SCF (10 ng/ml, black bars) or PBS control (white bars). (\* $p < 0.05$ ,  $n = 4$ ).
